# Supplementary material for: Bi- and tri-valent T cell engagers deplete tumour-associated macrophages in cancer patient samples
Source: PubMed Central journal article supplement (PMC6873687; doi:10.1186/s40425-019-0807-6), 2019-11-21

# Additional File 4

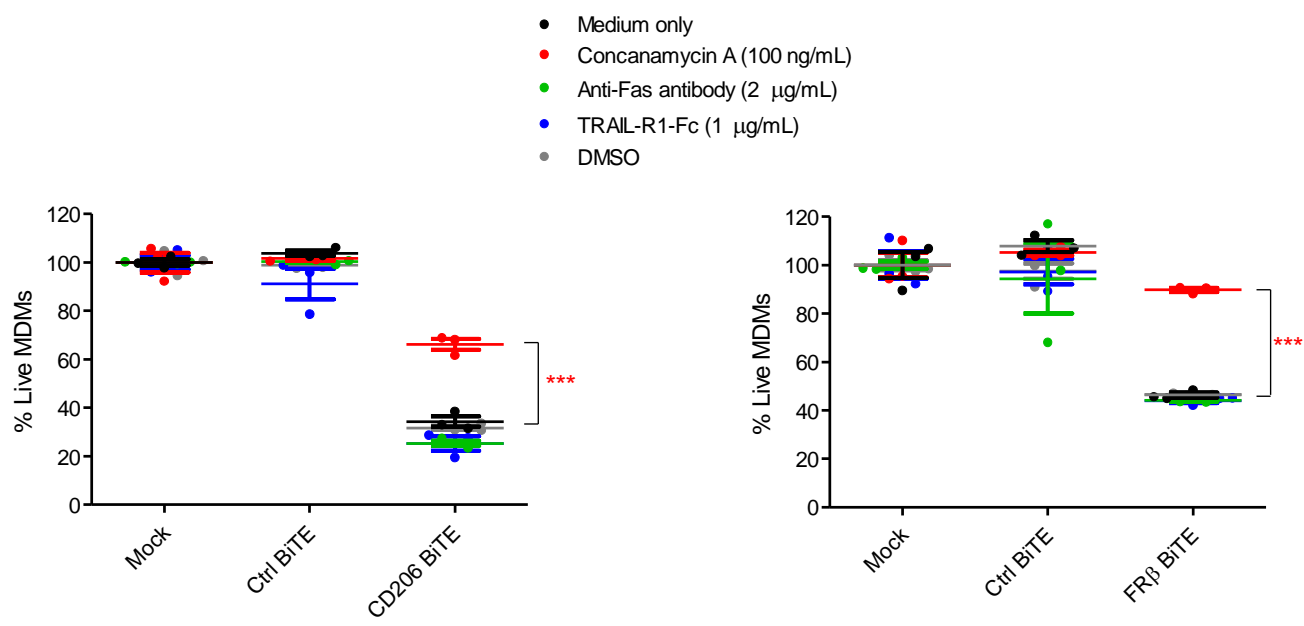

Supplement: 40425_2019_807_MOESM4_ESM.pdf [file 40425_2019_807_MOESM4_ESM.pdf]
