# Supplementary material for: Bi- and tri-valent T cell engagers deplete tumour-associated macrophages in cancer patient samples
Source: PubMed Central journal article supplement (PMC6873687; doi:10.1186/s40425-019-0807-6), 2019-11-21

# Additional File 7

Patient 10

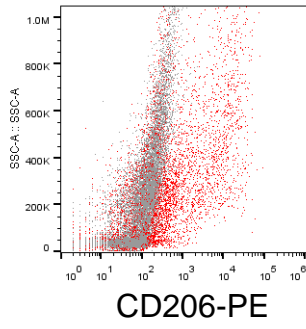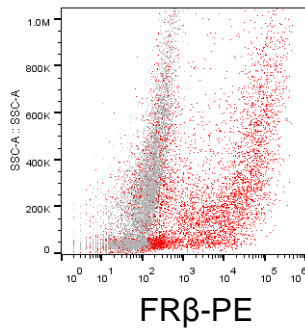

■ Iso  
■ Anti-CD206 or -FRβ

Patient 12

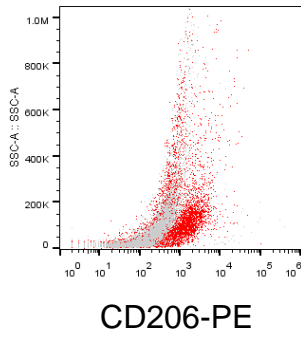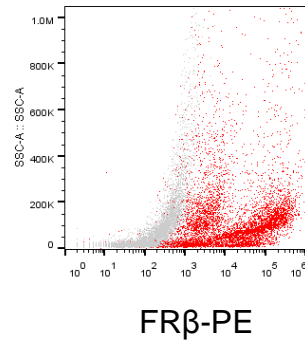

Patient 14

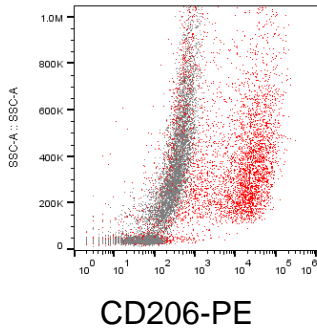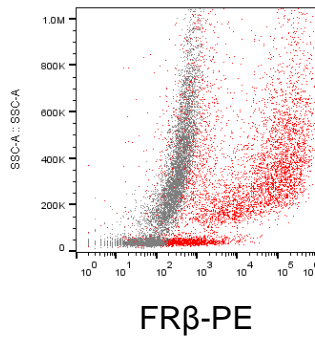

Patient 15

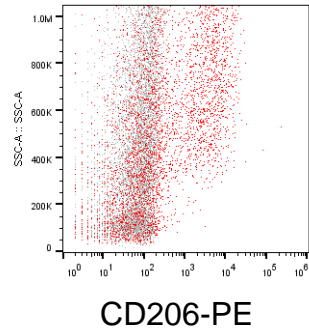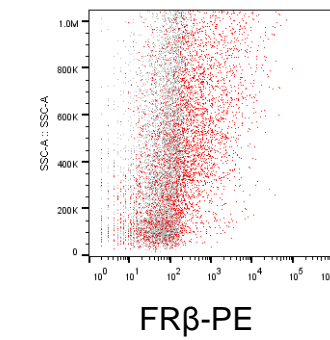

Patient 16

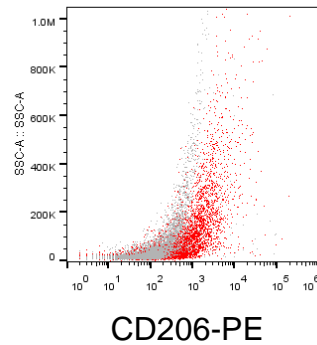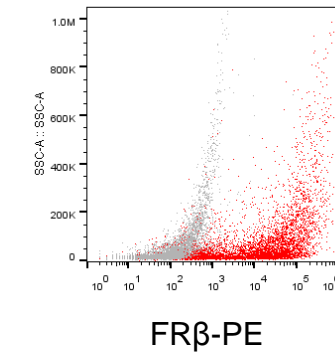

Supplement: 40425_2019_807_MOESM7_ESM.pdf [file 40425_2019_807_MOESM7_ESM.pdf]
