# Supplementary material for: Bi- and tri-valent T cell engagers deplete tumour-associated macrophages in cancer patient samples
Source: PubMed Central journal article supplement (PMC6873687; doi:10.1186/s40425-019-0807-6), 2019-11-21
Supplement: 40425_2019_807_MOESM13_ESM.pdf [file 40425_2019_807_MOESM13_ESM.pdf]

# Additional File 13

Estimates of virus particles (vp)/mL for purified virus stocks, as quantified by Picogreen and HPLC

|                   | <b>Picogreen</b>         | <b>HPLC</b>           |
|-------------------|--------------------------|-----------------------|
| <b>EnAd</b>       | $2.73 \times 10^{11}$    | $3.83 \times 10^{11}$ |
| <b>EnAd-Ctrl3</b> | $5.41865 \times 10^{11}$ | $8.02 \times 10^{11}$ |
| <b>EnAd-FR3</b>   | $3.27462 \times 10^{11}$ | $5.51 \times 10^{11}$ |
| <b>EnAd-3Ctrl</b> | $1.58983 \times 10^{11}$ | $2.40 \times 10^{11}$ |
| <b>EnAd-3FR</b>   | $9.24542 \times 10^{11}$ | $1.75 \times 10^{12}$ |
