# Supplementary material for: Bi- and tri-valent T cell engagers deplete tumour-associated macrophages in cancer patient samples
Source: PubMed Central journal article supplement (PMC6873687; doi:10.1186/s40425-019-0807-6), 2019-11-21
Supplement: 40425_2019_807_MOESM14_ESM.pdf [file 40425_2019_807_MOESM14_ESM.pdf]

# Additional File 14

Cellular composition of malignant ascites samples used in Figures 6 and 7.

| Sample ID  | Proportion of total cells in sample (%) |      |       |      |       |       |       |      |
|------------|-----------------------------------------|------|-------|------|-------|-------|-------|------|
|            | CD4                                     | CD8  | EpCAM | FAP  | PD-L1 | CD11b | CD206 | FR   |
| Patient 10 | 35.4                                    | 5.95 | 32.1  | 29.1 | 39.2  | 38.5  | 23.8  | 49.0 |
| Patient 12 | 30.1                                    | 7.90 | 4.80  | 0.77 | -     | 36.4  | 19.6  | 43.4 |
| Patient 14 | 30.9                                    | 10.5 | 11.5  | 1.80 | -     | 38.6  | 37.8  | 44.8 |
| Patient 15 | 30.2                                    | 9.04 | 22.6  | 2.41 | 24.6  | 43.2  | 29.2  | 31.9 |
| Patient 16 | 12.2                                    | 14.2 | 5.42  | 4.0  | 43.6  | 43.6  | 17.6  | 48.3 |
