# Supplementary material for: Bi- and tri-valent T cell engagers deplete tumour-associated macrophages in cancer patient samples
Source: PubMed Central journal article supplement (PMC6873687; doi:10.1186/s40425-019-0807-6), 2019-11-21
Supplement: 40425_2019_807_MOESM15_ESM.pdf [file 40425_2019_807_MOESM15_ESM.pdf]

# Additional File 15

Patient indications for malignant ascites samples used in this study.

| <b>Sample ID</b> | <b>Cancer type</b> |
|------------------|--------------------|
| Patient 1        | Unknown            |
| Patient 2        | Ovarian            |
| Patient 3        | Ovarian            |
| Patient 4        | Ovarian            |
| Patient 5        | Melanoma           |
| Patient 6        | Oesophageal        |
| Patient 7        | Ovarian            |
| Patient 8        | Pancreatic         |
| Patient 9        | Pancreatic         |
| Patient 10       | Breast             |
| Patient 11       | Peritoneal         |
| Patient 12       | Breast             |
| Patient 13       | Serous tubal       |
| Patient 14       | Unknown            |
| Patient 15       | Ovarian            |
| Patient 16       | Breast             |
